# Supplementary material for: Free-standing Ag/C coaxial hybrid electrodes as anodes for Li-ion batteries
Source: Royal Society of Chemistry journal article supplement (doi:10.1039/c3nr03772j), 2013-01-01
Supplement: c3nr03772j.pdf [file c3nr03772j.pdf]

Supplementary Information

## Free-standing Ag/C Coaxial Hybrid Electrode as Anodes for Li-Ion Batteries

Lijun Fu,<sup>\*a</sup> Kun Tang,<sup>a,e</sup> Chia-Chin Chen,<sup>a</sup> Lili Liu,<sup>d</sup> Xiangxin Guo,<sup>c</sup> Yan Yu,<sup>\*a,b</sup> and Joachim Maier<sup>a</sup>

<sup>a</sup> Max Planck Institute for Solid State Research, Heisenbergstr. 1, 70569, Stuttgart, Germany. Fax: 497116891722; Tel: 497116891721; E-mail: [L.Fu@fkf.mpg.de](mailto:L.Fu@fkf.mpg.de) (Dr. Lijun Fu); [Y.Yu@fkf.mpg.de](mailto:Y.Yu@fkf.mpg.de) (Prof. Dr. Yan Yu)

<sup>b</sup> School of Chemistry and Materials Science, University of Science and Technology of China, Hefei, 230026, China

<sup>c</sup> State Key Laboratory of High Performance Ceramics and Superfine Microstructure, Shanghai Institute of Ceramics, 1295 Dingxi Road, Shanghai 200050, China

<sup>d</sup> Laboratory of Molecular Catalysis and Innovative Materials, Fudan University, 220 Handan Road, Shanghai 200433, China

<sup>e</sup> National Institute of Clean-and-Low-Carbon Energy P. O. Box 001 Shenhua NICE, Future Science & Technology City, Changping District Beijing 102209, P. R. China

### Experimental section

*Synthesis of Ag/C coaxial nanocomposites:* The hydrothermal synthesis of 3D interconnected silver-Polyvinyl alcohol (PVA) composites was reported elsewhere <sup>1</sup>. Typically, 0.136 g PVA was dissolved into 18 mL deionized water at room temperature to form a clear solution, to which then 0.077 g AgNO<sub>3</sub> and 0.012 g NaCl were added. The solution was transferred into a 40 mL Teflon-lined stainless steel autoclave after stirring for 5 min. The sealed autoclave was maintained at 160 °C for 72 hrs and then cooled to room temperature. The yellow sponge-like product was collected, washed with deionized water to get rid of the remnants. After freeze-drying, the product was calcinated in N<sub>2</sub>/C<sub>3</sub>H<sub>6</sub> (98/2 v/v) atmosphere at 1000 °C for 2h to turn PVA into carbon and the Ag/C coaxial hybrid nanocomposites were obtained.

*Characterization:* The Ag/C coaxial hybrid nanocomposite was examined by X-ray diffraction (XRD, Bruker D8 Discover and field-emission scanning electron microscopy (FESEM, JSM-6700F). High-resolution transmission electronic microscopy (HRTEM) was performed using a JEOL JEM 2011 transmission electron microscope. Energy-dispersive X-ray spectroscopy (EDX) analysis was applied using an EDX system (Oxford Inca) with a condenser aperture of 25 nm.

*Electrochemical performance evaluation:* The electrochemical properties of the Ag/C coaxial hybrid electrode as anode in lithium ion batteries were investigated in Swagelok cells. The Ag/C coaxial hybrid nanocomposites were cut into pellets ( $\Phi = 8\text{mm}$ ) and used as working electrode directly (the mass of each electrode is  $\sim 1\text{ mg}$ ), lithium metal was used as counter electrode, separated by a glass fiber as separator and a solution consisting of 1.0 M LiPF<sub>6</sub>

in ethylene carbonate (EC) and dimethyl carbonate (DMC) as electrolyte (a volume ratio of 1:2, Novolyte Technologies). The cells were assembled in an Ar-filled glove box, with moisture and O<sub>2</sub> content being less than 1 ppm. The galvanostatic measurements were performed by an Arbin battery test system in the potential range of 0.005-3 V vs. Li<sup>+</sup>/Li. The cyclic voltammetry was conducted by Autolab instrument with a scan rate of 0.2 mV s<sup>-1</sup>. The cycled electrode for SEM examination was charged back to 3 V and kept at 3 V till current was lower than C/20 (1C = 372 mA g<sup>-1</sup>).

The electrochemical performance of HNO<sub>3</sub> etched Ag/C free-standing electrode and commercial Ag nanoparticles were investigated for the purpose of comparison. The Ag/C electrode was etched with concentrated HNO<sub>3</sub> to remove the silver in composites. The commercial Ag nanoparticles were mixed with super P and Polyvinylidene fluoride (PVDF) with a weight ratio of 8:1:1 in N-methyl-2-pyrrolidone (NMP) solvent, coated onto a copper foil and cut into pellets (Φ = 8 mm) after dried in vacuum at 80 °C overnight. The batteries were assembled in the same way as mentioned above.

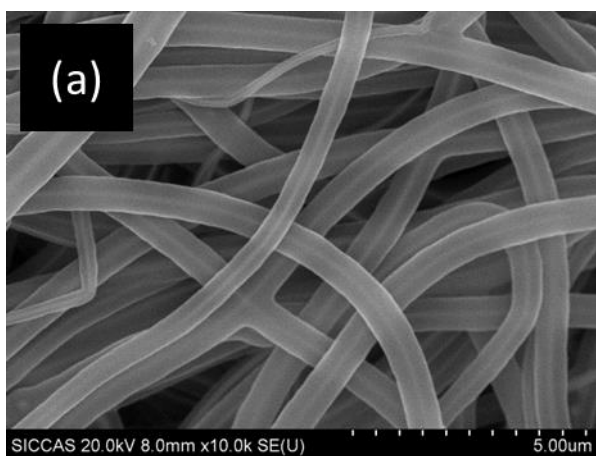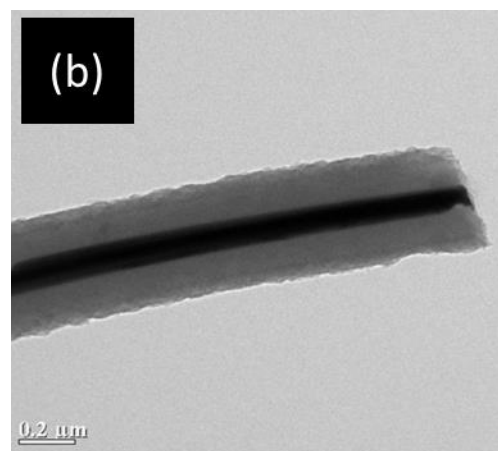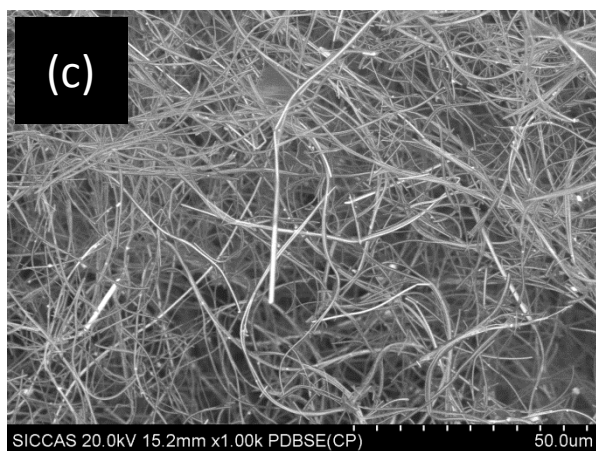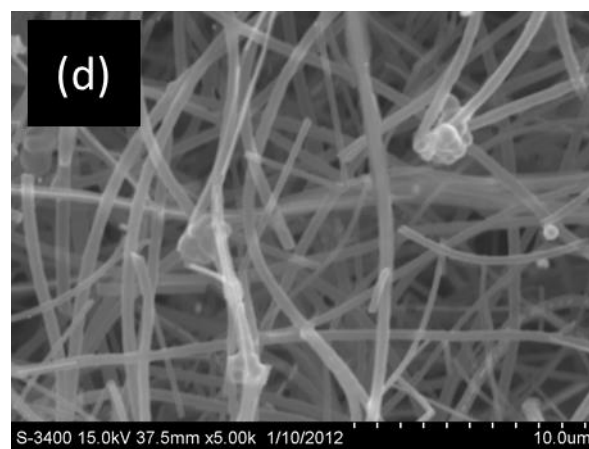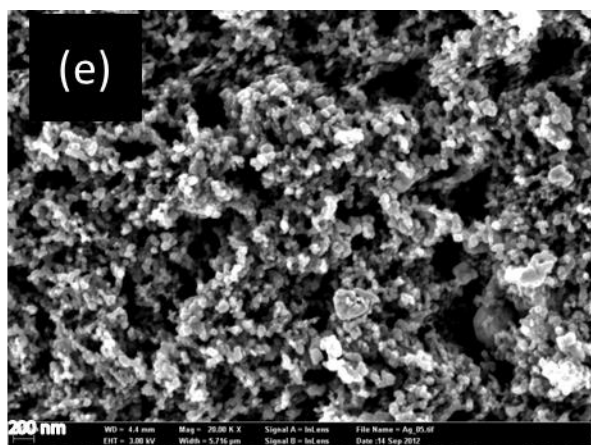

**Fig. S1** SEM images of (a) Ag/PVA coaxial hybrid composites; (c) free-standing Ag/C electrode with lower magnitude; (d) Ag/C coaxial hybrid electrode after etched by concentrated HNO<sub>3</sub>, and (e) commercial silver nanoparticles; (b) TEM image of the free-standing Ag/C electrode.

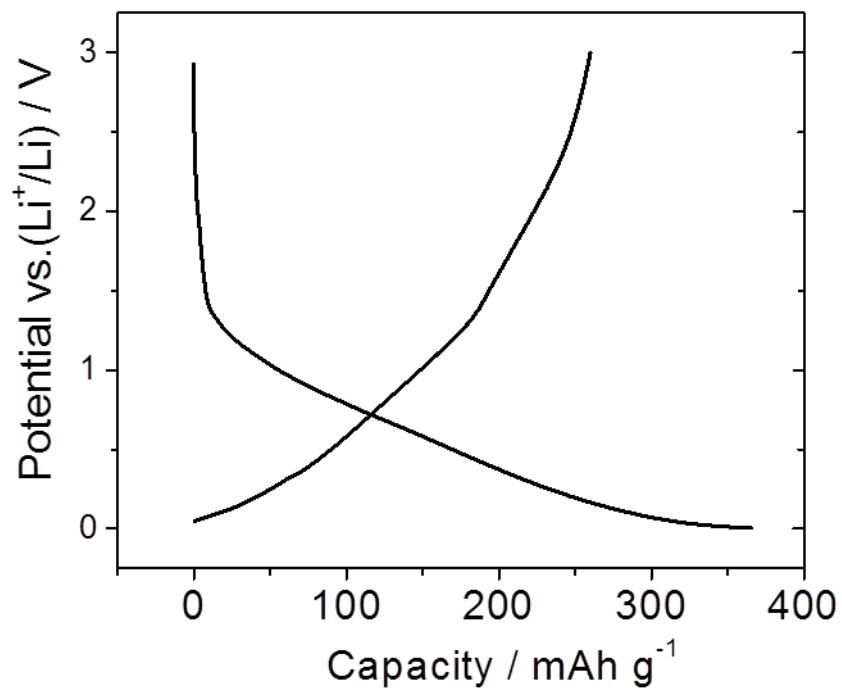

**Fig. S2** First discharge-charge profile of free-standing Ag/C electrode at 0.2 C.

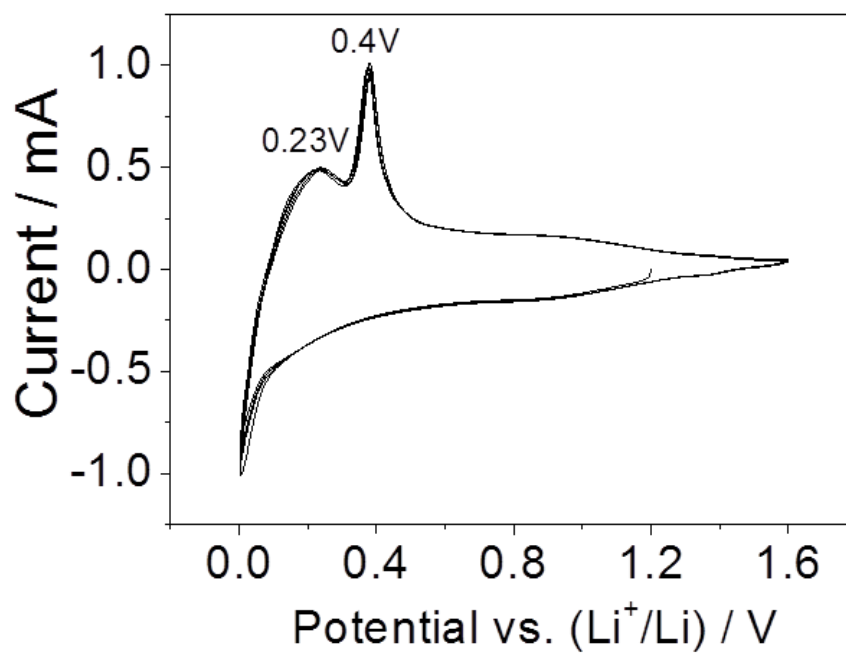

**Fig. S3** Cyclic voltammograms of free-standing Ag/C coaxial hybrid electrode after 10 cycles with a scan rate of 0.2 mV s<sup>-1</sup>.

#### Reference

1. L.-B. Luo, S.-H. Yu, H.-S. Qian and T. Zhou, *J. Am. Chem. Soc.*, 2005, **127**, 2822-2823.
